# Supplementary material for: High remnant cholesterol level is relevant to diabetic retinopathy in type 2 diabetes mellitus
Source: PubMed Central journal article supplement (PMC8772129; doi:10.1186/s12944-021-01621-7), 2022-01-20

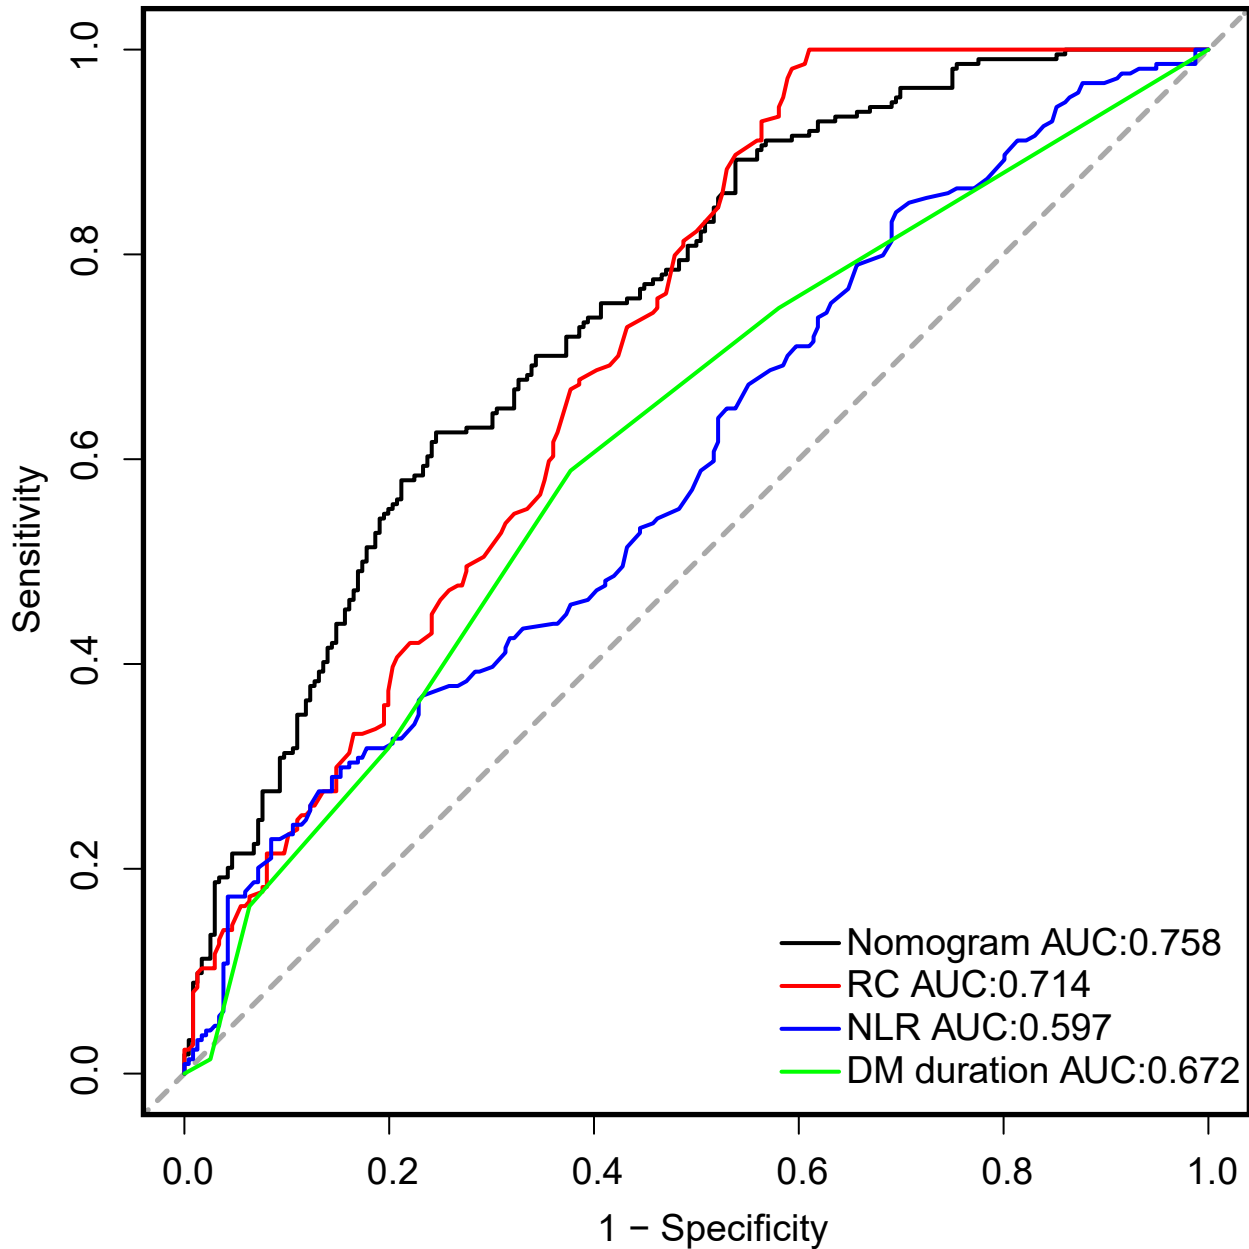

Supplement: 12944_2021_1621_MOESM2_ESM.pdf [file 12944_2021_1621_MOESM2_ESM.pdf]
